# Supplementary material for: NRD: Nicotiana Resistance Database, a Comprehensive Platform of Stress Tolerance in Nicotiana
Source: MDPI journal article supplement (doi:10.3390/agronomy12020508), 2022-02-17
Supplement: s1 [file s1]

# NRD: *Nicotiana* Resistance Database, a Comprehensive Platform of Stress Tolerance in *Nicotiana*

Yudong Chen<sup>1,†</sup>, Shuai Yang<sup>1,2,†</sup>, Jiaxuan Li<sup>3</sup>, Kesu Wei<sup>4</sup>, Long Yang<sup>1,\*</sup>

**Table S1.** Potential resistance genes identified in six *Nicotiana*.

| Genes      | BX     | K326   | Nben   | Nsyl   | Ntom   | TN90   | Total   | Percentage |
|------------|--------|--------|--------|--------|--------|--------|---------|------------|
| AP2        | 220    | 227    | 307    | 151    | 157    | 202    | 1,264   | 4.66%      |
| AQP        | 89     | 90     | 93     | 58     | 51     | 89     | 470     | 1.73%      |
| bZIP       | 203    | 209    | 136    | 121    | 133    | 201    | 1,003   | 3.70%      |
| CBF1       | 6      | 5      | 3      | 4      | 5      | 4      | 27      | 0.10%      |
| EF-hand    | 358    | 354    | 291    | 226    | 250    | 373    | 1,852   | 6.82%      |
| HSF        | 65     | 65     | 45     | 53     | 30     | 66     | 324     | 1.19%      |
| LEA        | 54     | 53     | 86     | 38     | 42     | 46     | 319     | 1.18%      |
| MYB        | 716    | 761    | 519    | 457    | 485    | 757    | 3,695   | 13.61%     |
| NAC        | 15     | 14     | 12     | 12     | 9      | 13     | 75      | 0.28%      |
| NFYA       | 49     | 53     | 17     | 32     | 34     | 54     | 239     | 0.88%      |
| NFYB       | 107    | 106    | 108    | 81     | 64     | 121    | 587     | 2.16%      |
| PKinase    | 3,144  | 3,212  | 1,856  | 2,260  | 2,140  | 3,316  | 15,928  | 58.68%     |
| R2R3MYB    | 48     | 50     | 48     | 52     | 37     | 46     | 281     | 1.04%      |
| WRKY       | 226    | 224    | 139    | 131    | 124    | 234    | 1,078   | 3.97%      |
| Total      | 5,300  | 5,423  | 3,660  | 3,676  | 3,561  | 5,522  | 27,142  | 100.00%    |
| Percentage | 19.53% | 19.98% | 13.48% | 13.54% | 13.12% | 20.34% | 100.00% |            |

BX: *N. tabacum* cv. Basma Xanthi, K326: *N. tabacum* cv. K326, Nsyl: *N. sylvestris*, Nben: *N. benthamiana*, Ntom: *N. tomentosiformis*, TN90: *N. tabacum* cv. TN90.
